# Supplementary material for: Mechanisms of synthetic lethality between BRCA1/2 and 53BP1 deficiencies and DNA polymerase theta targeting
Source: Springer Nature journal article supplement (doi:10.1038/s41467-023-43677-2), 2023-11-29
Supplement: MOESM1 [file 41467_2023_43677_MOESM1_ESM.pdf]

Supplementary Information  
Supplemental Figure 1.

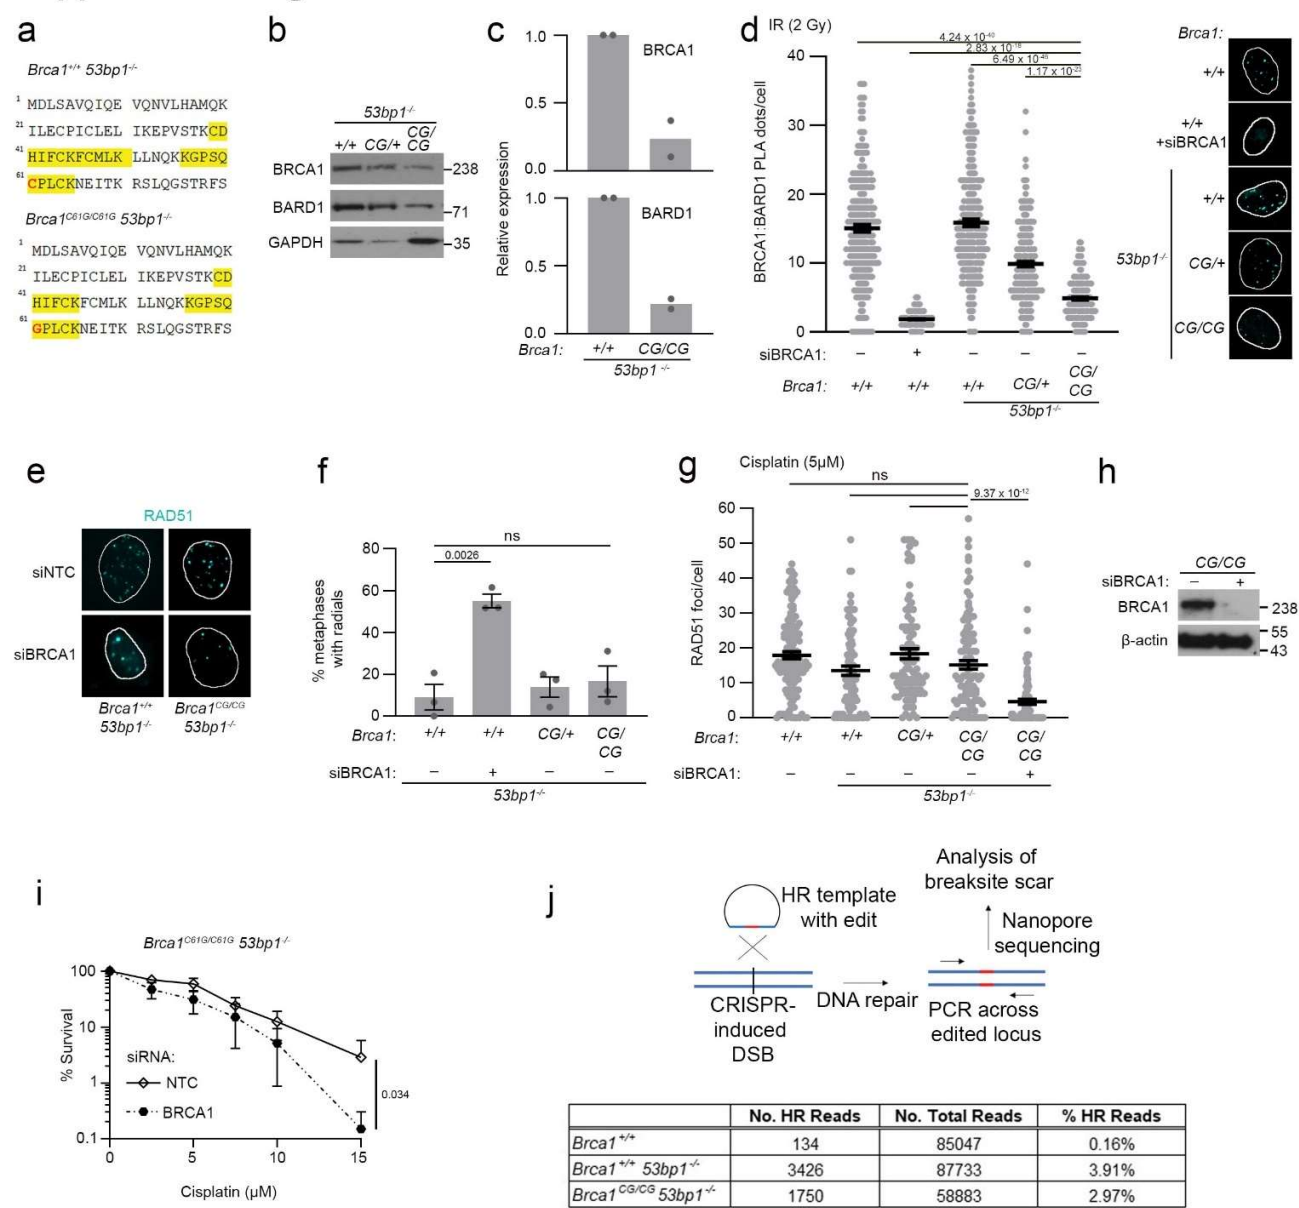

Supplementary Fig. 1. *Brca1*<sup>C61G/C61G</sup> 53bp1<sup>-/-</sup> cells support HR.

- a.** BRCA1 N-terminal peptides identified by mass spectrometry, highlighted in yellow, from *Brca1*<sup>+/+</sup> 53bp1<sup>-/-</sup> and *Brca1*<sup>C61G/C61G</sup> 53bp1<sup>-/-</sup> mouse embryonic fibroblasts.
- b.** Representative western blot analysis of BRCA1, BARD1 protein levels in MEFs. The expression of GAPDH was used as a loading control.
- c.** BRCA1-BARD1 protein levels in *Brca1*<sup>+/+</sup> 53bp1<sup>-/-</sup> and *Brca1*<sup>C61G/C61G</sup> 53bp1<sup>-/-</sup> cells, relative to GAPDH loading controls and wild-type protein. n=2 biological replicates, data are mean ± SEM.

- d.** Quantification of proximity-linked ligation assay foci (PLA) between BRCA1 and BARD1 in cells treated with 2 Gy irradiation and with NTC siRNA (–) or siRNA targeting BRCA1 (+) and fixed 2 hours later.  $n \geq 200$  cells from 5 biological replicates. Bars depict median  $\pm$  SEM.
- e.** Representative images of RAD51 foci in *Brca1*<sup>+/+</sup> *53bp1*<sup>-/-</sup> and *Brca1*<sup>C61G/C61G</sup> *53bp1*<sup>-/-</sup> cells, 3 hours after exposure to 2 Gy irradiation, treated with siNTC or siRNA targeting BRCA1.
- f.** Percentage of metaphases that show one or more radial chromosomes in MEFs of the genotypes shown, treated with NTC siRNA (–) or siRNA targeting BRCA1 (+).  $n=3$  biological replicates, data are mean  $\pm$  SEM.
- g.** Quantification of RAD51 foci following 16 hours 5  $\mu$ M cisplatin exposure in EdU-positive MEFs of the genotypes shown, treated with NTC siRNA (–) or siRNA targeting BRCA1 (+).  $n>100$  cells from 3 biological replicates. Data are mean  $\pm$  SEM.
- h.** Representative western blot showing knockdown of BRCA1 in *Brca1*<sup>C61G/C61G</sup> *53bp1*<sup>-/-</sup> cells.
- i.** Colony survival following 16 hours of treatment with cisplatin, measured in *Brca1*<sup>C61G/C61G</sup> *53bp1*<sup>-/-</sup> cells treated with non-targeting control siRNA (NTC) or BRCA1 siRNA transfection,  $n=3$  biological replicates, data are mean  $\pm$  SEM.
- j.** Illustration of the HR assay (top). The table below shows the % of reads containing the 4 bp inclusion and the total number of reads.

Statistical analysis in d, f, and g was performed using a two-tailed Student's t-Test, without adjustment for multiple comparisons. Statistical analysis in i was performed using a two-way ANOVA. Source data are provided as a Source Data file.

Supplemental Figure 2

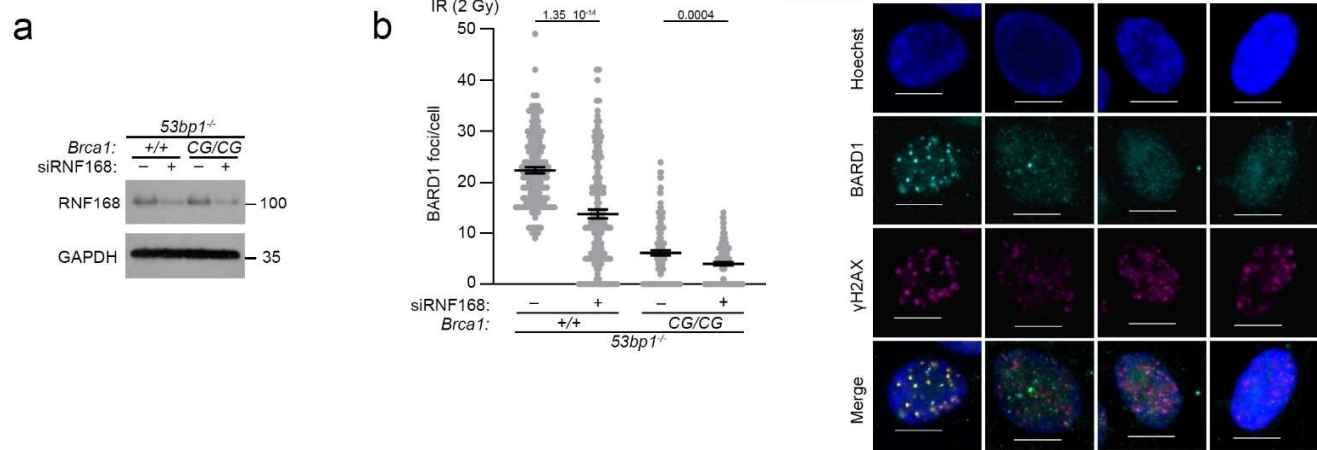

**Supplementary Fig. 2. Impact of RNF168 depletion on BARD1 localisation.**

- a.** Western blot analysis of RNF168 protein levels following non-targeting control (-) or RNF168 (+) targeting siRNA treatment.
- b.** Quantification of BARD1 foci 3 hours after 2 Gy IR exposure in EdU-positive MEFs of the genotypes shown and which were treated with NTC siRNA or RNF168 siRNA. n=150 cells from 3 biological replicates. Data are mean  $\pm$  SEM. Images (right) show representative images of BARD1 foci in the genotypes shown with and without RNF168 depletion. The scale bar is 10  $\mu$ m.

All statistical analysis in this figure was performed using a two-tailed Student's t-Test, without adjustment for multiple comparisons. Source data are provided as a Source Data file.

### Supplemental Figure 3.

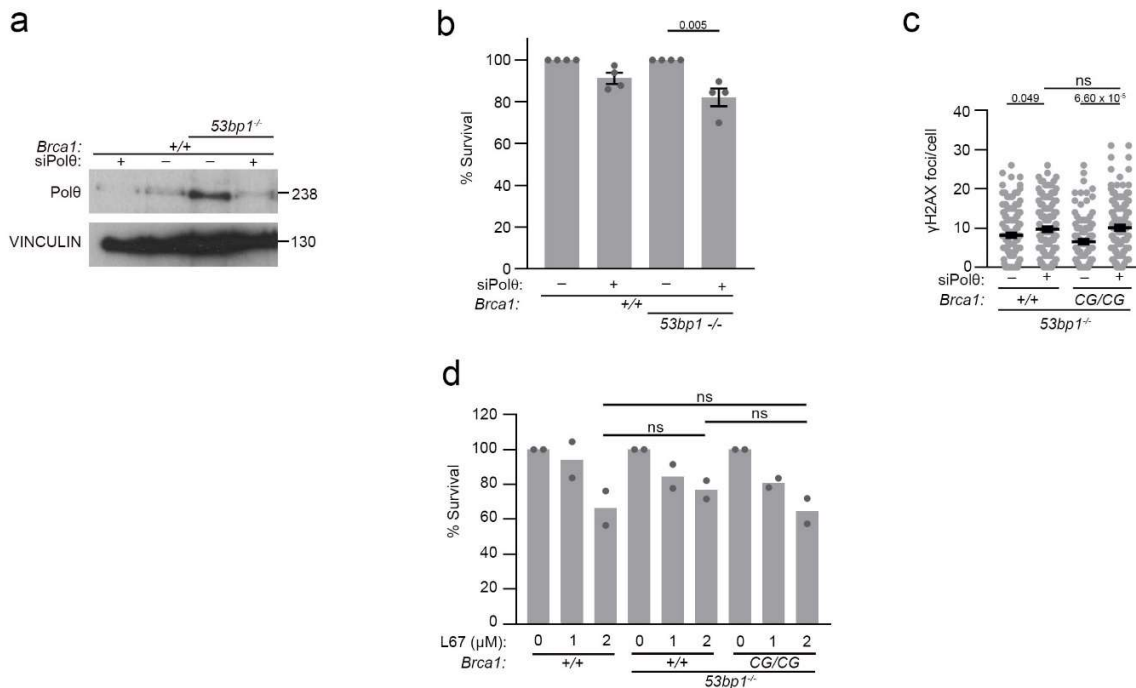

#### Supplementary Fig. 3. Assessment of Polθ siRNA and Ligase I/III inhibitor sensitivity.

**a.** Western blot of Polθ in genotypes shown, treated with control (-) siRNA or siRNA to Polθ (+).

**b.** Colony survival in MEFs of the genotypes shown treated with control (-) or Polθ (-) siRNA normalised to untreated genotype matched controls. n=4 biological repeats. Data are mean ± SEM.

**c.** γH2AX foci, in asynchronous cells of the genotypes shown (all are 53bp1<sup>-/-</sup>), treated with non-targeting control (NTC) (-) or Polθ (+) siRNA. n=120 cells per condition from 3 biological replicates. Data are mean ± SEM.

**d.** Colony survival in MEFs of the genotypes shown treated with the Ligase I/III inhibitor, L67, normalised to untreated genotype matched controls. n=2 biological replicates. Data are mean ± SD.

All statistical analysis in this figure was performed using a two-tailed Student's t-Test, without adjustment for multiple comparisons. Source data are provided as a Source Data file.

## Supplemental Figure 4.

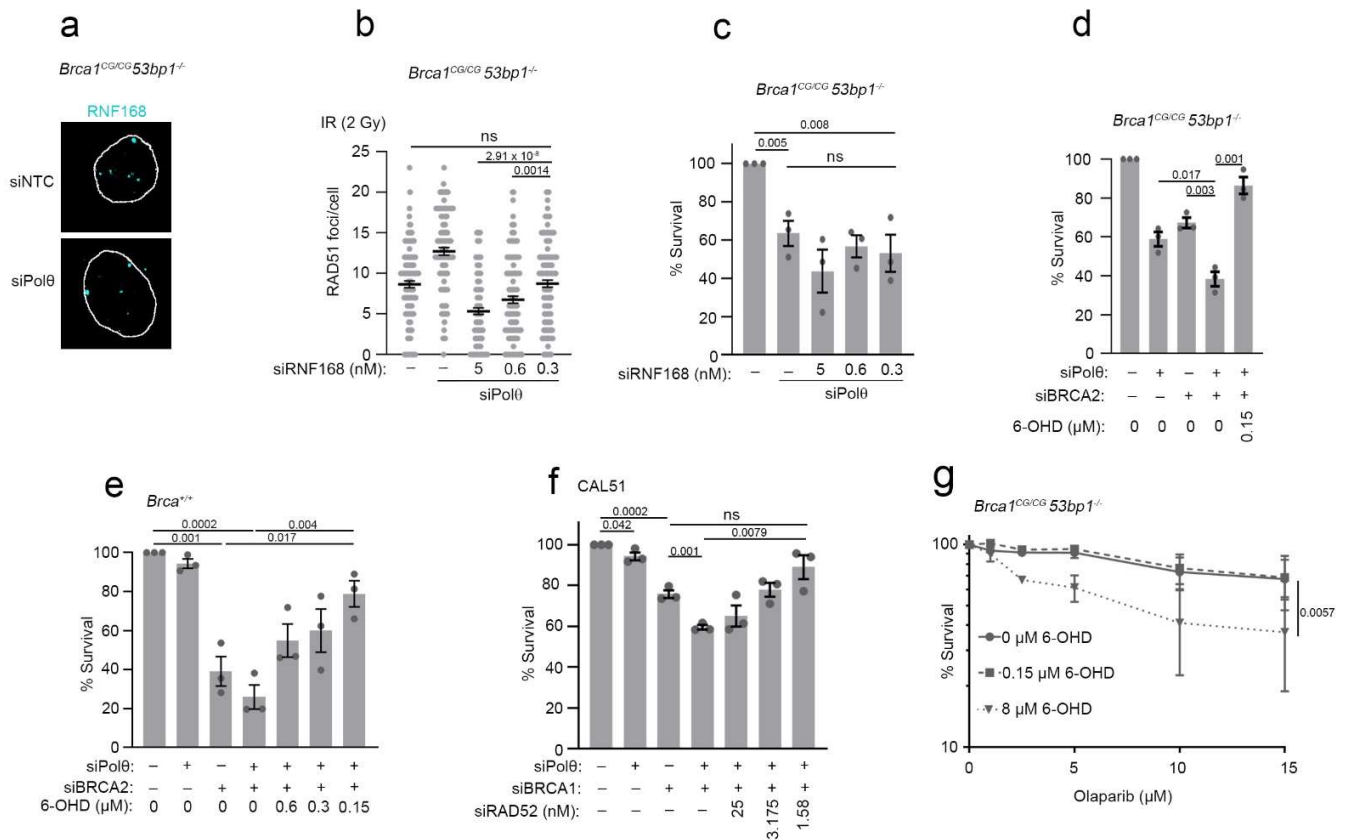

**Supplementa Fig. 4. RNF168 depletion does not suppress the toxicity of Polθ depletion, low concentration RAD52 inhibition suppresses the toxicity of Polθ depletion in BRCA2 and BRCA1 depleted cells and has no impact on Olaparib sensitivity.**

**a.** Representative images of RNF168 foci in *Brca1<sup>C61G/C61G</sup> 53bp1<sup>-/-</sup>* cells, 72 hours after treatment with siNTC or siRNA targeting Polθ.

**b.** Quantification of RAD51 foci 4 hours post 2 Gy IR exposure, in EdU-positive *Brca1<sup>C61G/C61G</sup> 53bp1<sup>-/-</sup>* cells treated with siRNA targeting Polθ (+), or control siRNA (-) with or without siRNA targeting RNF168. n=100 cells from 2 biological replicates. Data are mean ± SEM.

**c.** Colony survival in *Brca1<sup>C61G/C61G</sup> 53bp1<sup>-/-</sup>* cells treated with siNTC or Polθ siRNA, with or without siRNA targeting RNF168. n=3 biological replicates, data are mean ± SEM.

**d.** Colony survival in *Brca1<sup>C61G/C61G</sup> 53bp1<sup>-/-</sup>* cells treated with siNTC (-) or Polθ siRNA, with or without BRCA2 siRNA and the RAD52 inhibitor, 6-OHD. n=3 biological replicates, data are mean ± SEM.

**e.** Colony survival of wild-type MEFs treated with siNTC (-) or Polθ siRNA, with or without BRCA2 siRNA and the RAD52 inhibitor, 6-OHD. n=3 biological replicates, data are mean ± SEM.

**f.** Colony survival of CAL51 cells treated with BRCA1 siRNA and Polθ siRNA with decreasing amounts of RAD52 siRNA. n=3, data are mean ± SEM.

**g.** Colony survival of *Brca1<sup>C61G/C61G</sup> 53bp1<sup>-/-</sup>* cells treated with the concentrations shown of RAD52 inhibitor 6-OHD and increasing doses of olaparib. n=2 biological replicates, data are mean ± SEM.

Statistical analysis in b-f was performed using a two-tailed Student's t-Test, without adjustment for multiple comparisons. Statistical analysis in g was performed using a two-way ANOVA. Source data are provided as a Source Data file.

## Supplemental Figure 5.

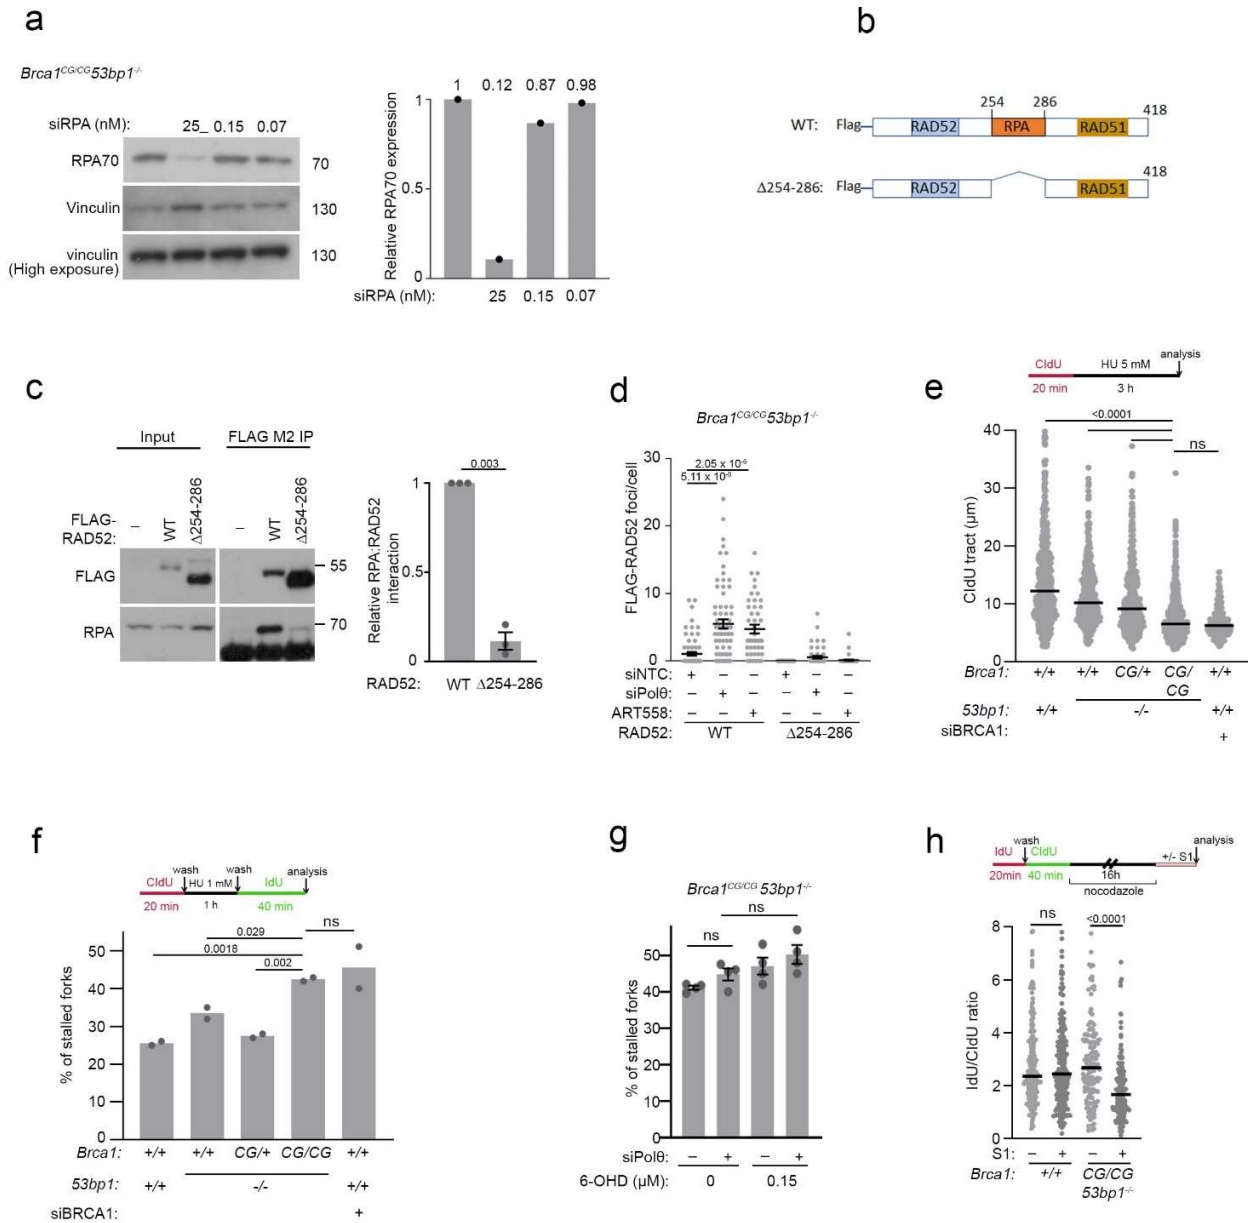

**Supplementary Figure 5. Assessment of replication features for correlation with the Polθ:RAD52 relationship.**

- a.** Western blot analysis of RPA70 protein levels following non-targeting control (–) or RPA70 targeting siRNA treatment with indicated concentrations.
- b.** Schematic of RAD52 constructs, illustrating the regions of RAD52 that interact with RAD51 and RPA.
- c.** Immunoprecipitation of FLAG-RAD52 mutants and immunoblot for FLAG-RAD52 and RPA. Graph (right) shows quantification from 3 independent experiments. Data are mean ± SEM.
- d.** FLAG-RAD52 foci generated by wild-type FLAG-RAD52 and FLAG-RAD52 missing amino acids 254–286 in asynchronous *Brca1<sup>C61G/C61G</sup> 53bp1<sup>-/-</sup>* cells treated with siRNA to Polθ or with ART558 (10 μM). n≥45 cells per condition, from 2 biological replicates. Data are mean ± SEM.
- e.** Top, schematic of fork stability assay. CldU tract length from cells with the illustrated genotypes treated with hydroxyurea (5 mM, 3 h). n>200 fibres from 3 biological replicates. Bars=median.
- f.** % fibres with first-label terminations from cells with the illustrated genotypes. n>800 fibres from 2 biological replicates. Data are mean ± SEM.
- g.** % fibres with first label terminations from *Brca1<sup>C61G/C61G</sup> 53bp1<sup>-/-</sup>* cells treated with Polθ siRNA, and/or RAD52 inhibitor, 6-OHD. n>250 fibres from 4 biological replicates. Data are mean ± SEM.
- h.** S1 nuclease assay in G2/M in wild-type and *Brca1<sup>C61G/C61G</sup> 53bp1<sup>-/-</sup>* cells, illustrated in the cartoon above, for ssDNA gaps formed in nascent DNA in the previous S phase. n>140 from 1 biological replicate. Bar=median.

Statistical analysis in c, d, f, and g was performed using a two-tailed Student's t-Test, without adjustment for multiple comparisons. Statistical analysis in e and h was performed using a Mann Whitney test. Source data are provided as a Source Data file.

We assessed stalled replication forks, the stability of which are reduced in *Brca1<sup>C61G/C61G</sup> 53bp1<sup>-/-</sup>* cells (Supplemental Fig. 5e). While neither Polθ siRNA nor 0.15 μM 6-OHD, influenced stalled fork instability in HU-treated *Brca1<sup>C61G/C61G</sup> 53bp1<sup>-/-</sup>* cells, their combination improved fork protection (Fig. 4h). These data suggest that while not affecting the amount of nascent DNA lost, Polθ depletion biases degradation towards a RAD52-mediated mechanism. Polθ and RAD52 also participate in the recovery of stalled forks<sup>11,83,51,52,54</sup>. We noted that the reduced restart of HU-stalled forks in Polθ depleted *Brca1<sup>C61G/C61G</sup> 53bp1<sup>-/-</sup>* cells was worsened by RAD52 inhibitor addition (Supplemental Fig. 5f & g), consistent with a recent report of a synthetic reduction in fork restart<sup>54</sup>. We next examined the exposure of the nucleotide analogue BrdU in cells labelled for 48 hours in non-denatured, native DNA fibres, indicating ssDNA. ssDNA lengths increased following treatment with Polθ siRNA and were MRE11-dependent, as previously reported<sup>16,17</sup> and were also suppressed by RAD52 inhibitor (Fig. 4i). However, since ssDNA lengths were increased after 0.15 μM 6-OHD RAD52 inhibitor treatment alone, which has no influence of cell survival (not shown), we conclude that gross ssDNA is unlikely to be the underlying structure for RAD52: Polθ synthetic lethality in *Brca1<sup>C61G/C61G</sup> 53bp1<sup>-/-</sup>* cells. In summary, fork instability, poor fork restart and increased gross ssDNA do not correlate with the RAD52:Polθ viability relationship, suggesting they are unlikely to be reflective of where Polθ is most required.



## Supplemental Figure 6

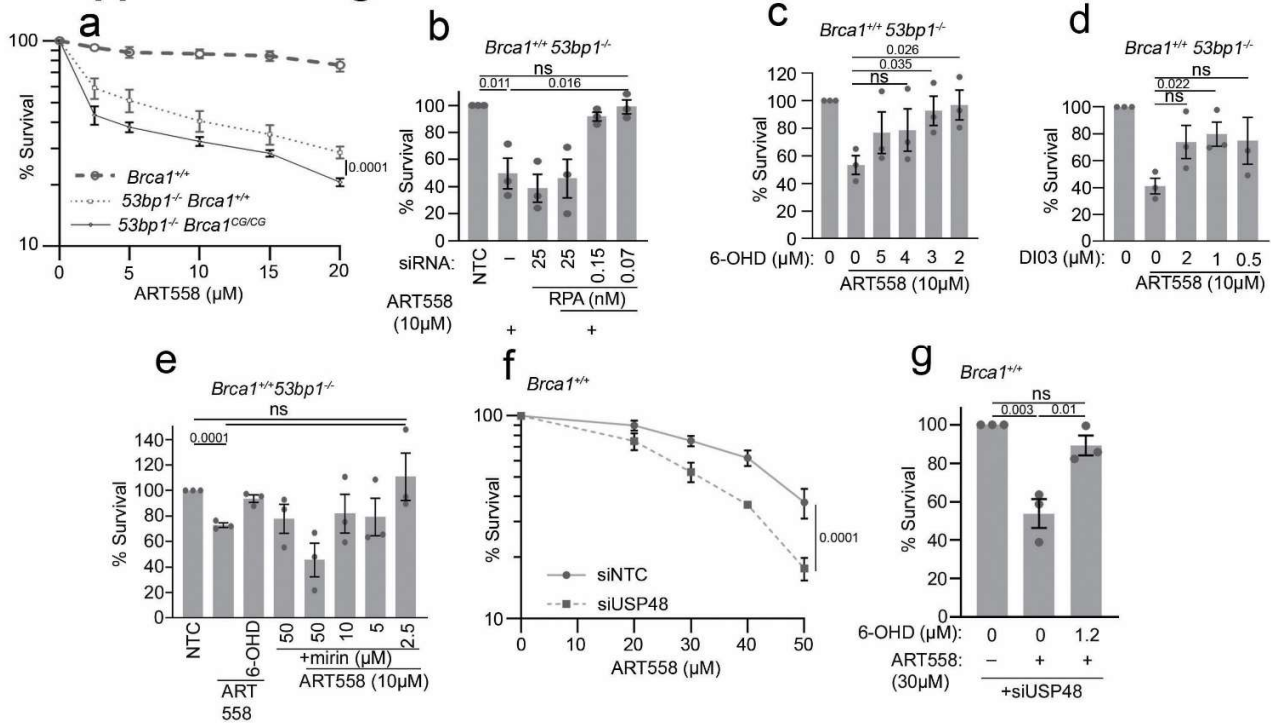

### Supplementary Fig. 6. Synthetic lethality between 53BP1 loss and Polθ inhibition is suppressed by RAD52 inhibition.

**a.** Colony survival in wild-type (WT), *53bp1*<sup>-/-</sup> and *Brca1*<sup>C61G/C61G</sup> *53bp1*<sup>-/-</sup> cells treated with increasing doses of ART558 for 72 hours. n=6 biological repeats. Data are mean ± SEM.

**b.** Colony survival of *53bp1*<sup>-/-</sup> cells (with WT BRCA1), treated with 10 μM Polθ inhibitor ART558 and decreasing concentrations of RPA siRNA. n=4 biological repeats. Data are mean ± SEM.

**c.** Colony survival in *53bp1*<sup>-/-</sup> cells treated with 10 μM ART558 and decreasing doses of RAD52 inhibitor 6-OHD. n=3 biological repeats. Data are mean ± SEM.

**d.** Colony survival in *53bp1*<sup>-/-</sup> cells treated with 10 μM ART558 and decreasing doses of RAD52 inhibitor DI03. n=3 biological repeats. Data are mean ± SEM.

**e.** Colony survival of *53bp1*<sup>-/-</sup> cells, treated with 10 μM Polθ inhibitor ART558, 0.15 μM 6-OHD and the MRE11 inhibitor mirin. n=3 biological repeats. Data are mean ± SEM.

**f.** Colony survival of wild-type cells treated with non-targeting control (NTC) or USP48 siRNA and increasing concentrations of the Polθ inhibitor ART558. n=3 biological repeats. Data are mean ± SEM.

**g.** Colony survival of wild-type cells, treated with NTC siRNA (-) or USP48 siRNA and 30 μM Polθ inhibitor ART558 with either vehicle or 1.2 μM RAD52 inhibitor 6-OHD. n=3 biological repeats. Data are mean ± SEM.

Statistical analysis in b-e and g was performed using a two-tailed Student's t-Test, without adjustment for multiple comparisons. Statistical analysis in a and f was performed using a two-way ANOVA. Source data are provided as a Source Data file.



Supplemental Figure 7

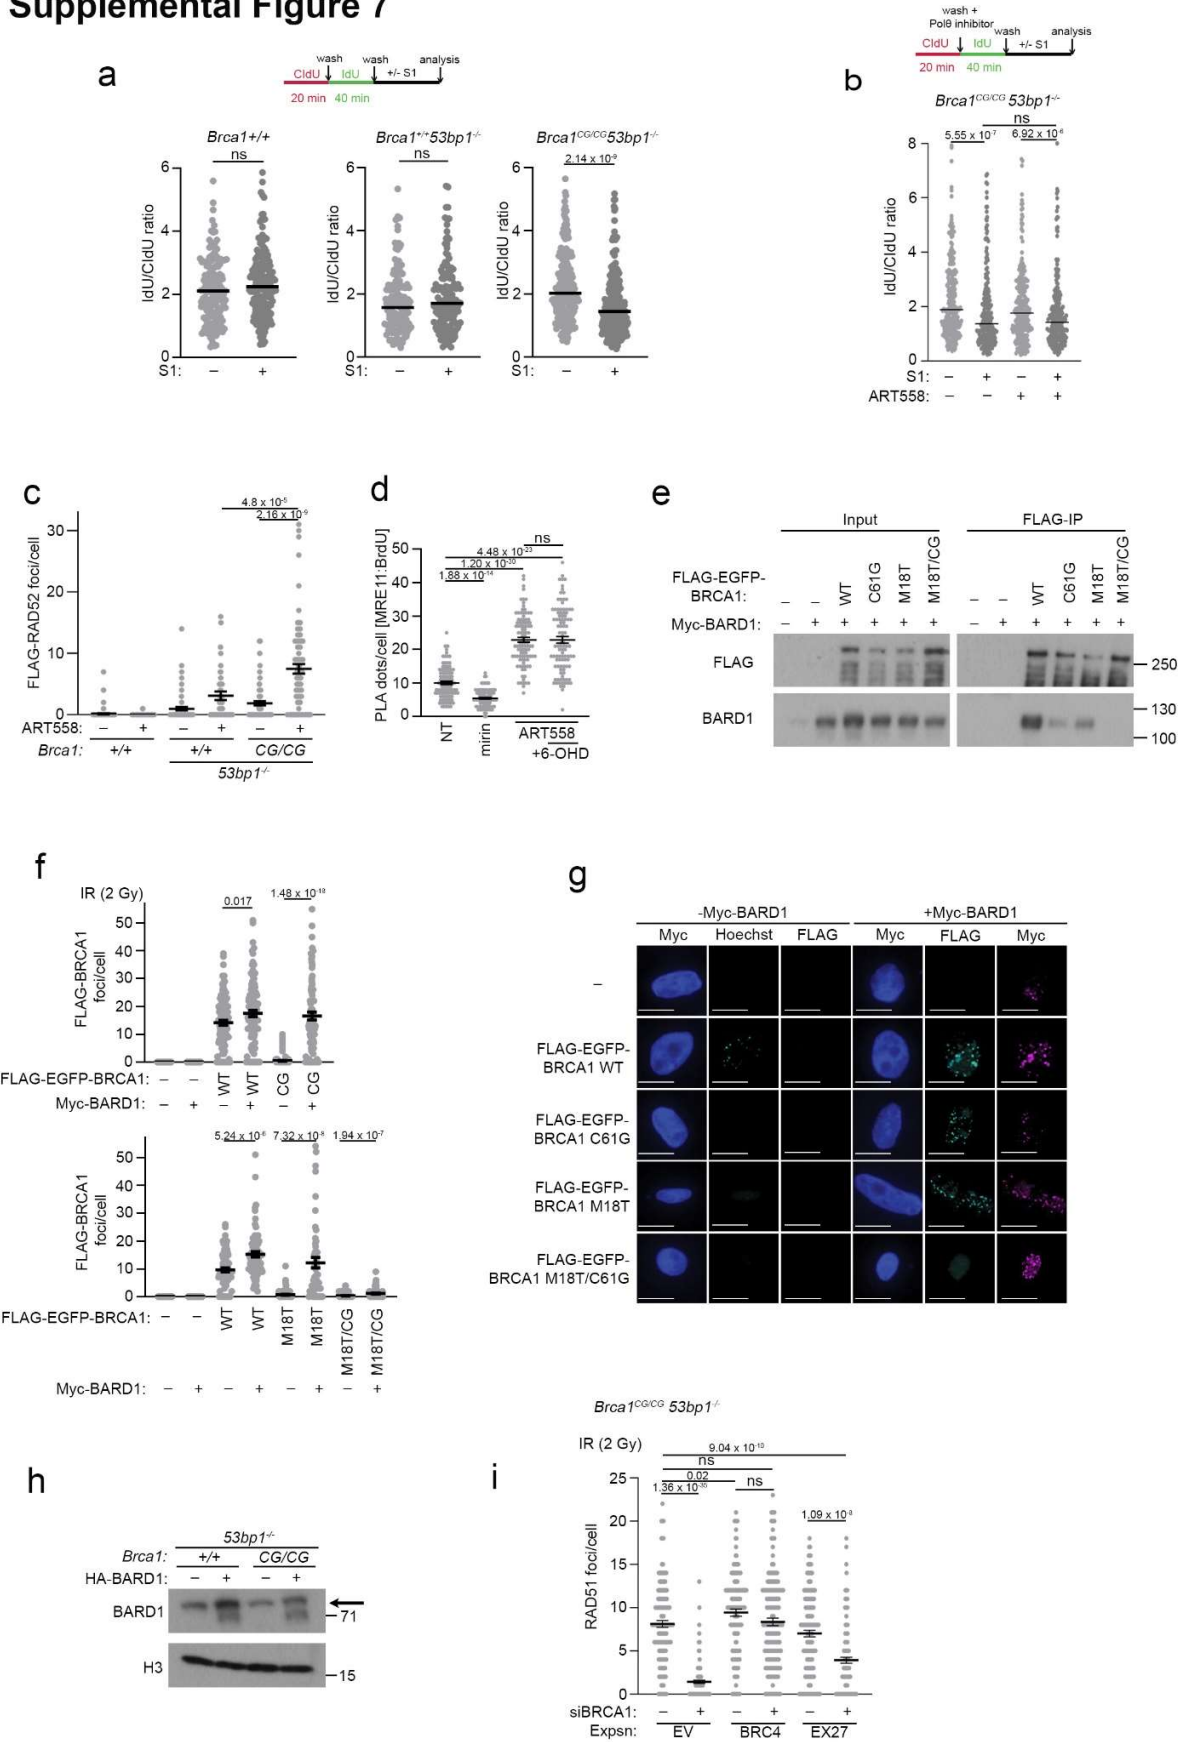

**Supplementary Fig.7 BARD1 influence on C61G-BRCA1 foci formation and BRCA2 fragment RPA fusions on RAD51 foci formation in BRCA1-depleted cells.**

- a.** S1 nuclease assay, illustrated in the cartoon above, for ssDNA gaps in nascent DNA in the genotypes shown. n>320 fibers per condition from 3 replicates. Bar=median.
- b.** S1 nuclease assay of *Brca1*<sup>C61G/C61G</sup> *53bp1*<sup>-/-</sup> cells with and without 10  $\mu$ M ART558 treatment. n>220 fibres per condition from 3 replicates. Bar=median.
- c.** FLAG-RAD52 foci in asynchronous cells with the genotypes shown treated with Pol $\theta$  inhibitor ART558.
- d.** Quantification of proximity-linked ligation assay foci (PLA) between MRE11 and BrdU. Cells were treated with the indicated inhibitors for 72 h and with 10  $\mu$ M BrdU 48 h before fixation. n=100 cells from 2 biological replicates, bars depict mean  $\pm$  SEM.
- e.** Representative blot of FLAG-immunoprecipitation of human FLAG-EGFP-tagged BRCA1 variants from U2OS cells expressing exogenous human myc-BARD1.
- f.** Quantification of FLAG-EGFP-tagged BRCA1 variant foci in Edu-positive cells with and without co-expression of human myc-BARD1 following a 2-hour recovery from 2 Gy IR. n=120 from 3 biological repeats (upper panel) and n=60 from 2 biological repeats (lower panel). Data are mean  $\pm$  SEM.
- g.** Representative images of FLAG-EGFP-tagged BRCA1 foci and mc-tagged BARD1 foci from U2OS cells following a 2-hour recovery from 2 Gy IR. Scale bars represent 10  $\mu$ m.
- h.** Expression levels of BARD1 in the MEF genotypes shown with (+) and without (-) co-expression of murine BARD1.
- i.** RAD51 foci in Edu-positive *Brca1*<sup>C61G/C61G</sup> *53bp1*<sup>-/-</sup> cells treated with non-targeting control (NTC), or BRCA1 siRNA and infected with empty pMSCV-IRES-EGFP (EV) retrovirus or those expressing RPA-70-BRCA2-BRC4 (BRC4) or RPA-70-BRCA2-Exon27 (Ex27). n=3 biological replicates, data are mean  $\pm$  SEM.

All statistical analysis in this figure was performed using a two-tailed Student's t-Test, without adjustment for multiple comparisons. Source data are provided as a Source Data file.

**Supplementary Table 1 – Antibodies.**

| Antibody (clone)               | Host   | Supplier                                 | Cat. number               | Lot number         | Technique  | Conc            | RRID        |
|--------------------------------|--------|------------------------------------------|---------------------------|--------------------|------------|-----------------|-------------|
| β-actin                        | Rabbit | Abcam                                    | Ab8227                    | GR3215935-1        | WB         | 1:3000          | AB_2305186  |
| Human BARD1                    | Rabbit | Abcam                                    | ab226854                  | GR3197067-8        | WB         | 1:2000          | N/A         |
| Murine BARD1                   | Rabbit | Gift from R.Baer (McCarthy et al., 2003) | N/A                       | N/A                | WB/IF      | 1:1000          | N/A         |
| Human BRCA1 (D-9)              | Mouse  | Santa Cruz                               | Sc6954                    | C2519              | IF         | 1:500           | AB_626761   |
| Human BRCA1 (MS110)            | Mouse  | MERCK Millipore                          | OP94                      | 3091924            | WB         | 1:500           | AB_213438   |
| Murine BRCA1 (56E)             | Rabbit | Gift from R.Baer                         | N/A                       | N/A                | IF         | 1:1000          | N/A         |
| Murine BRCA1 (C40)*            | Rabbit | Dundee cell Products                     | Custom design             |                    | IP         |                 | N/A         |
| Murine BRCA1 (287.17)          | Mouse  | Santa Cruz                               | sc-135732                 | D2121              | IF         | 1:50            | AB_2243740  |
| Murine BRCA1                   | Rabbit | Affinity Bioscience                      | AF6288                    | 14f1430            | WB         | 1:1000          | AB_2835138  |
| Polymerase theta               | Rabbit | MyBiosource                              | MBS9612322                | 85i9616            | WB         | 1:500           |             |
| CldU (BrdU)                    | Rat    | Abcam                                    | Ab6326                    | GR3173537-9        | Fibres/IF  | 1:2000          | AB_305426   |
| Flag (M2)                      | Mouse  | SigmaAldrich                             | F1804                     | SLBT7654           | WB         | 1:1000          | AB_262044   |
| IdU (BrdU)                     | Mouse  | BD Biosciences                           | 347580                    | 8151735            | Fibres/PLA | 1:500/<br>1:200 | AB_400326   |
| γH2AX                          | Rabbit | Abcam                                    | Ab2893                    | GR3242597-1        | IF         | 1:2000          | AB_303388   |
| PALB2                          | Rabbit | Bethyl                                   | A301.246A                 |                    | WB         | 1:2000          | AB_890607   |
| RNF168                         | Sheep  | Novus Biologicals                        | AF7217                    |                    | IF/WB      | 1:1000          | AB_10971653 |
| RAD51 (Ab-1)                   | Rabbit | Calbiochem                               | PC130                     | 3135376<br>3668125 | PLA<br>IF  | 1:100<br>1:1000 | AB_2238184  |
| Mre11                          | Rabbit | Novus Biologicals                        | NB100-142                 | V-1                | PLA        | 1:200           | AB_10077796 |
| RAD52                          | Sheep  | Gift from Fena Ochs/Claudia Lukas        | University of Copenhagen. |                    | WB         | 1:1000          | N/A         |
| RPA70                          | Mouse  | Abcam                                    | Ab176467                  | GR3249141-1        | WB         | 1:1000          | N/A         |
| Tubulin                        | Mouse  | Santa Cruz                               | sc-5286                   | H0613              | WB         | 1:5000          | AB_628411   |
| Vinculin [EPR8185]             | Rabbit | Abcam                                    | Ab129002                  | GR221671-50        | WB         | 1:2000          | AB_11144129 |
| Donkey α Mouse AlexaFluor 488  | Donkey | Life technologies                        | A21202                    | 1975519            | IF/fibres  | 1:5000          | AB_141607   |
| Donkey α Rabbit AlexaFluor 488 | Donkey | Life technologies                        | A21206                    | 1874771            | IF         | 1:500           | AB_2535792  |
| Donkey α Mouse AlexaFluor 555  | Donkey | Life technologies                        | A31570                    | 1774719            | IF/fibres  | 1:500           | AB_2536180  |
| Donkey α Rabbit AlexaFluor 555 | Donkey | Life technologies                        | A31572                    | 1945911            | IF         | 1:500           | AB_162543   |
| Donkey α Rat AlexaFluor 555    | Donkey | Life technologies                        | A21434                    | 1987272            | fibres     | 1:500           | AB_2535855  |
|                                | Donkey |                                          | A21208                    | 2480078            | IF/fibres  | 1:500           | AB_2535794  |
| Donkey α Rat AlexaFluor 488    |        | Life technologies                        |                           |                    |            |                 |             |
| Rabbit α Mouse HRP             | Rabbit | Dako                                     | P0161                     | 20062080           | WB         | 1:1000<br>0     | AB_2687969  |
| Swine α Rabbit HRP             | Swine  | Dako                                     | P0217                     | 20047666           | WB         | 1:1000<br>0     | AB_2728719  |

*\*Antibody generation.* Murine BRCA1 residues 1-300 bearing a Histidine tag and expressed in bacteria was used as an immunogen in Rabbits (Dundee cell products). The antibody is available on request to the corresponding authors subject to completion of a standard MTA.

**Supplementary Table 2 - siRNA sequences**

| Target                             | siRNA Sequences                                  | Supplier |
|------------------------------------|--------------------------------------------------|----------|
| NTC (Renilla Luciferase)<br>mBRCA1 | Sense: CUUACGCUGAGUACUUCGA[dT][dT]               | Sigma    |
|                                    | Antisense: [Phos]UCGAAGUACUCAGCGUAA G[dT][dT]    | Aldrich  |
|                                    | Sense: GGAUUUAUCUGCCGUCCAA [dT][dT]              | Sigma    |
|                                    | Antisense: [Phos] UUGGACGGCAGAUAAAUCC[ [dT][dT]  | Aldrich  |
|                                    | Sense: GAACAGAGCAACUUGAAAC [dTdT]                |          |
| mRNF168                            | Antisense: [Phos] AUUGUCUGUAUAGUCCACAGG [dT][dT] |          |
|                                    | Sense: CCUUGGCUUCUCCUUUGAGUU [dT][dT]            | Sigma    |
| mRAD52                             | Antisense: [Phos] AACUCAAAGGAGAAGCCAAGG [dT][dT] | Aldrich  |
|                                    | Sense: UUGAAGGUCAUCGGGUAAUUA [dT][dT]            | Sigma    |
| mRAD52                             | Antisense: [Phos]UAAUUACCCGAUGACCUUCAA [dT][dT]  | Aldrich  |
|                                    | Sense: ACUAUCUGAGGUCACUAAUA [dT][dT]             |          |
|                                    | Antisense: [Phos] UAUUUAGUGACCUCAGAUAGU [dT][dT] |          |
|                                    | Sense: CCCACAUGACUCGAACAUUAA [dT][dT]            |          |
|                                    | Antisense: [Phos] UUAAGUUCGAGUCAUGUGGG [dT][dT]  |          |
|                                    | Sense: CAGACUUAGAGGACAUCAUUA [dT][dT]            |          |
|                                    | Antisense: [Phos] UAAUGAUGUCCUCUAGUCUG [dT][dT]  |          |
|                                    | Sense: GCAGAGACUCUGAACCUCAUA [dT][dT]            |          |
|                                    | Antisense: [Phos] UAUGAGGUUCAGAGUCUCUGC [dT][dT] |          |
|                                    | Sense: CCAGACUAAGAGUUCUCAUA [dT][dT]             | Sigma    |
|                                    | Antisense:[Phos] UUAUGAGAACUCUAGUCUGG [dT][dT]   | Aldrich  |
|                                    | Sense: CCAGGAAUCAAGACGACAAU [dT][dT]             |          |
|                                    | Antisense:[Phos] AUUGUCGUCUUUGAUUCCUGG [dT][dT]  |          |
|                                    | Sense: CACGGAAGAAAGCGUUGUUUA [dT][dT]            |          |
|                                    | Antisense:[Phos] UAAACAACGCUUUCUUCGUG [dT][dT]   |          |
| mRADX                              | Sense: CAUAGAGGCCAGCCGUUA [dT][dT]               | Sigma    |
|                                    | Antisense:[Phos] UAUACGGCUGGCCUCUAUG [dT][dT]    | Aldrich  |
|                                    | Sense: GAAAGUAUCCACGGAUUUU [dT][dT]              |          |
|                                    | Antisense:[Phos] AAAUUUCCGUGGAAUACUUUC [dT][dT]  |          |
|                                    | Sense: GGGAUAAUACUGCUAUAAAG [dT][dT]             |          |
| mBRCA2                             | Antisense:[Phos] CUUUUAAGCAGUAAUUAUCCC [dT][dT]  |          |
|                                    | Sense: CGGCGUUUCUAAAGAGUGCAU [dT][dT]            | Sigma    |
| mRPA32                             | Antisense: [Phos] AUGCACUUUUAGAAACGCCG [dT][dT]  | Aldrich  |
|                                    | Sense: AGUAAACCAGGACUGGAUUUC [dT][dT]            | Sigma    |
| mRPA70                             | Antisense: [Phos] GAAAUCCAGUCCUGGUUUACU [dT][dT] | Aldrich  |
|                                    | Sense: GCCUGAAGAUCGCUAACAAA [dT][dT]             |          |
| mUSP48                             | Antisense: [Phos] UUUUGUAGCGAUUUUAGGGC [dT][dT]  |          |
|                                    | Sense: AUUCCUUUGUGGGCUUGACUA[dT][dT]             |          |
|                                    | Antisense: [Phos] UAGUCAAGCCCACAAAGGAAU[dT][dT]  |          |
|                                    | Sense: AUUCUGGCCACUACAUCGCAC[dT][dT]             |          |
|                                    | Antisense: [Phos]GUGCGAUGUAGUGGCCAGAAU[dT][dT]   |          |
| hBRCA1                             | Sense: GCUCCUCUCACUCUUCAGU[dT][dT]               | Sigma    |
|                                    | Antisense: [Phos] ACUGAAGAGUGAGAGGAGC [dT][dT]   | Aldrich  |
| hPolQ                              | Sense: AAGCUCCUCUCACUCUUCAGU [dT][dT]            | Sigma    |
|                                    | Antisense: [Phos]ACUGAAGAGUGAGAGGAGCUU [dT][dT]  | Aldrich  |
|                                    | Sense: CGUCGUCUUAUUAAGUGUUA [dT][dT]             |          |
|                                    | Antisense: [Phos]UAACACUUGAAUGAGACGACG [dT][dT]  |          |
|                                    | Sense: CCUUAAGACUGUAGGUACU[dT][dT]               |          |
| hRad52                             | Antisense: [Phos]AGUACCUACAGUCUUAAGG [dT][dT]    |          |
|                                    | Sense: CCACCAGAAACCACAAGCAA [dT][dT]             | Sigma    |
|                                    | Antisense: [Phos]UUUGCUUGUGGUUUCUGGUGG [dT][dT]  | Aldrich  |
|                                    | Sense: CGGGUAAUUAUCUGGCCAAU [dT][dT]             |          |
|                                    | Antisense: [Phos]AUUGGCCAGAUUAAUACCCG [dT][dT]   |          |

**Supplementary Table 3** – primer, template, and gRNA sequences

| Gene                     | Point mutation (human)  | Point mutation (murine) | Sequences (5'-3-)                                                                                                                                                                                                                                                                                                                                                                                                                                                                                                                                                                                                                                                                                                                                                                                                                                                                                                                                                                                                                                                                                                                                                                                                                                                                        | Supplier         |
|--------------------------|-------------------------|-------------------------|------------------------------------------------------------------------------------------------------------------------------------------------------------------------------------------------------------------------------------------------------------------------------------------------------------------------------------------------------------------------------------------------------------------------------------------------------------------------------------------------------------------------------------------------------------------------------------------------------------------------------------------------------------------------------------------------------------------------------------------------------------------------------------------------------------------------------------------------------------------------------------------------------------------------------------------------------------------------------------------------------------------------------------------------------------------------------------------------------------------------------------------------------------------------------------------------------------------------------------------------------------------------------------------|------------------|
| BARD1                    | L44R                    | L38R                    | Forward: GCTTGCCCGCCGGGAGAAGCTGCTG<br>Reverse: ACTGGGCATCCTGAGCCAACACAG                                                                                                                                                                                                                                                                                                                                                                                                                                                                                                                                                                                                                                                                                                                                                                                                                                                                                                                                                                                                                                                                                                                                                                                                                  | Sigma<br>Aldrich |
|                          | F133A/D135A/A136E (AAE) | F125A/D127A/A128E (AAE) | Forward: CATTTTATTGAATTCTTCTCTTCTTCAGCACCAGCTAAA<br>CTTGCCCTAGATG TGTGTCTTTTGAAT<br>Reverse: ATTCAAAAGACAACACATCTAGGGCAAGTTTAGCTGGTGCT<br>GAAGAAAGGAAGAAGAATTCAATAAAAAATG                                                                                                                                                                                                                                                                                                                                                                                                                                                                                                                                                                                                                                                                                                                                                                                                                                                                                                                                                                                                                                                                                                                | Sigma<br>Aldrich |
|                          | A460T                   | A448T                   | Forward: CGGTGTCCATCCAGTATGGTCTTTAACATTTGGGT<br>Reverse: ACCCAAATGTTAAAGACCATACTGGATGGACACCG                                                                                                                                                                                                                                                                                                                                                                                                                                                                                                                                                                                                                                                                                                                                                                                                                                                                                                                                                                                                                                                                                                                                                                                             | Sigma<br>Aldrich |
|                          | D712A                   | D700A                   | Forward: GATGGTCTGAGTCACAGCACTGTCTGGCTTGGG<br>Reverse: CCCAAGCCAGACAGTGTCTGACTCAGACCATC                                                                                                                                                                                                                                                                                                                                                                                                                                                                                                                                                                                                                                                                                                                                                                                                                                                                                                                                                                                                                                                                                                                                                                                                  | Sigma<br>Aldrich |
| BRCA1                    | M18T                    | -                       | Forward: CAAATGTCATTAATGCTTTGCAGAAAATCTTAGAGTG                                                                                                                                                                                                                                                                                                                                                                                                                                                                                                                                                                                                                                                                                                                                                                                                                                                                                                                                                                                                                                                                                                                                                                                                                                           | Sigma<br>Aldrich |
| Rosa 26 F                |                         |                         | AGAAAACCTGGCCCTTGCCATT                                                                                                                                                                                                                                                                                                                                                                                                                                                                                                                                                                                                                                                                                                                                                                                                                                                                                                                                                                                                                                                                                                                                                                                                                                                                   | Sigma<br>Aldrich |
| Roas26 R                 |                         |                         | CAGCCTCGATTGTGGTGTATG                                                                                                                                                                                                                                                                                                                                                                                                                                                                                                                                                                                                                                                                                                                                                                                                                                                                                                                                                                                                                                                                                                                                                                                                                                                                    | Sigma<br>Aldrich |
| Rosa26 HR assay template |                         |                         | GGGGGAGTCGTTTTACCCGCCGCCGGCGGGCCTCGTCGCTGATTGGC<br>TCTCGGGGCCAGAAAACCTGGCCCTT GCCATTGGCTCGTGTCGTGCAA<br>GTTGAGTCCATCCGCCGCCAGCGGGGGCGGCGAGGAGGCGCTCCAG<br>GTTG CGGCCCTCCCTCGGCCCGCGCCGAGAGTCTGGCCGCGCGCCC<br>CTGCGCAACGTGGCAGGAAGCGCGCGCTG GGGCGGGGACGGGCAGT<br>AGGGCTGAGCGGCTGCGGGGCGGGTGCAAGCACGTTTCCGACTTGAGT<br>TGCTCAA GAGGGGCGTGCTGAGCCAGACCTCCATCGCGCACTCCGGG<br>GAGTGGAGGGAAGGAGCGAGGGCTCAGTTGGGCT GTTTTGAGGCAG<br>GAAGCACTTGCTCTCCAAAGTCGCTCTGAGTTGTTATCAGTAAGGGAGC<br>TGCACTGGAGTAG GCGGGGAGAAGGCCGACCCCTTCTCCGAGGGGG<br>GAGGGGAGTGTTGCAATACCTTCTGGGAGTTCTCTGCTGC CTCCTGGC<br>TTCTGAGGACCGCCTGGGCCTGGGAGAATCCCTTCCCTCTTCCCTCG<br>TGATCTGCA <del>ACTCCAGTCTTTCTAGAAG</del> tactGCGGGAGTCTTCTGGGCA<br>GGCTTAAAGGCTAACCTGGTGTGTGGGCGTTGTCTGCAGGGG AATTG<br>AACAGGTGTAAATTTGGAGGGACAAGACTTCCACAGATTTTCGGTTTT<br>GTCGGGAAGTTTTTAATAGGGG CAAATAAGGAAAATGGGAGGATAG<br>GTAGTCATCTGGGGTTTTATGCAGCAAACTACAGGTTATTATTGCTTGT<br>GAT CCGCCTCGGAGTATTTTCCATCGAGGTAGATTAAAGACATGCTCAC<br>CCGAGTTTTATACTCTCCTGCTTGAGATCC TTAATAAGTATGAAATTAC<br>AGTGTCGCGAGTTAGACTATGTAAGCAGAAATTTAATCATTTTTAAAGA<br>GCCAGTAC TTCATATCCATTTCTCCGCTCCTTCTGCAGCCTATCAAAA<br>GGTATTTTAGAACACTCATTTAGCCCCATTTTCATT TATTATACTGGCTT<br>ATCCAACCCCTAGACAGAGCATTGGCATTTTCCCTTCTGATCTTAGAA<br>GTCTGATGACTCATGAAACCAGACA | Genscript        |
| Rosa26 gRNA              |                         |                         | ACTCCAGTCTTTCTAGAAGA                                                                                                                                                                                                                                                                                                                                                                                                                                                                                                                                                                                                                                                                                                                                                                                                                                                                                                                                                                                                                                                                                                                                                                                                                                                                     |                  |

**Supplementary Table 4** - Details of chemical reagents, DNA damaging agents and inhibitors

| Inhibitor           | Company       | Catalogue Number | Target                   | Concentration   |
|---------------------|---------------|------------------|--------------------------|-----------------|
| <b>Olaparib</b>     | Selleckchem   | S1060            | PARP                     | 1-20 $\mu$ M    |
| <b>BrdU</b>         | Sigma-Aldrich | B5002            | Thymidine analogue       | 5-100 nM        |
| <b>Cisplatin</b>    | Sigma-Aldrich | PHR1624          | DNA-crosslinker          | 1-5 $\mu$ M     |
| <b>CldU</b>         | Sigma-Aldrich | C6891            | Thymidine analogue       | 250 $\mu$ M     |
| <b>EdU</b>          | Thermofisher  | A10044           | Thymidine analogue       | 10 $\mu$ M      |
| <b>IdU</b>          | Sigma-Aldrich | I7125            | Thymidine analogue       | 25 $\mu$ M      |
| <b>Hydroxyurea</b>  | Sigma-Aldrich | H8627            | Ribonucleoside reductase | 1-10 mM         |
| <b>Colcemid</b>     | Gibco         | 15212012         | Microtubule poison       | 0.05 $\mu$ g/ml |
| <b>6-OH-DL-DOPA</b> | Sigma         | H2380            | RAD52/APE1               | 0.15-5 $\mu$ M  |
| <b>DI03</b>         | Sigma         | SML2496          | RAD52                    | 0.5-10 $\mu$ M  |
| <b>Novobiocin</b>   | Selleckchem   | NSC2382          | Polymerase Theta         | 50-200 $\mu$ M  |
| <b>ART558</b>       | Artios        | n/a              | Polymerase Theta         | 2.5-20 $\mu$ M  |
| <b>L67</b>          | Sigma-Aldrich | SML1797          | DNA Ligase I/III         | 1-2 $\mu$ M     |
